# Supplementary material for: Modeling attainment in Fairbanks, Alaska, for the wintertime PM2.5 24-hour non-attainment area using the CMAQ (community multi-scale air quality) model
Source: Royal Society of Chemistry journal article supplement (doi:10.1039/d4fd00158c), 2025-01-01
Supplement: d4fd00158c1.pdf [file d4fd00158c1.pdf]

## Supplementary Figures and Tables

### Additional Time Series Plots NO<sub>3</sub>, EC and other

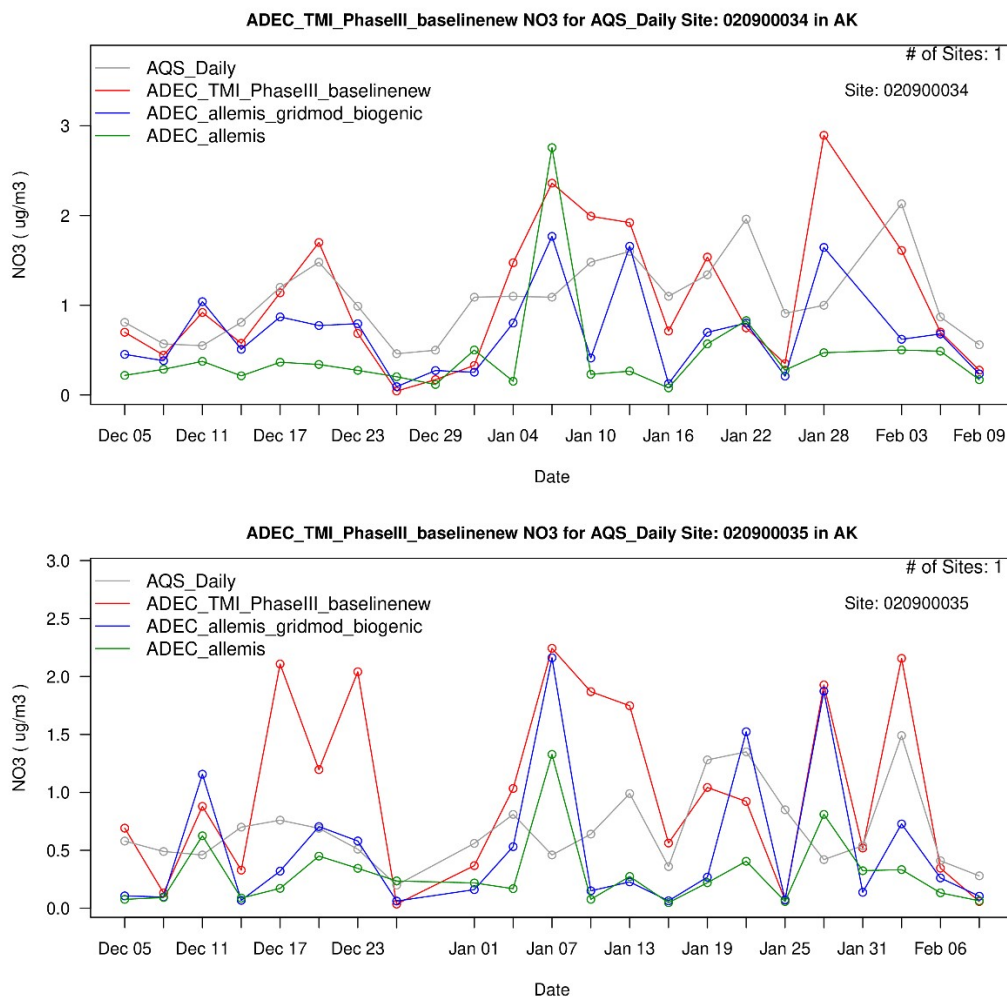

S 1: Timeseries of NO<sub>3</sub> at NCore (020900034) and Hurst Road (020900035) monitors for the modeling period

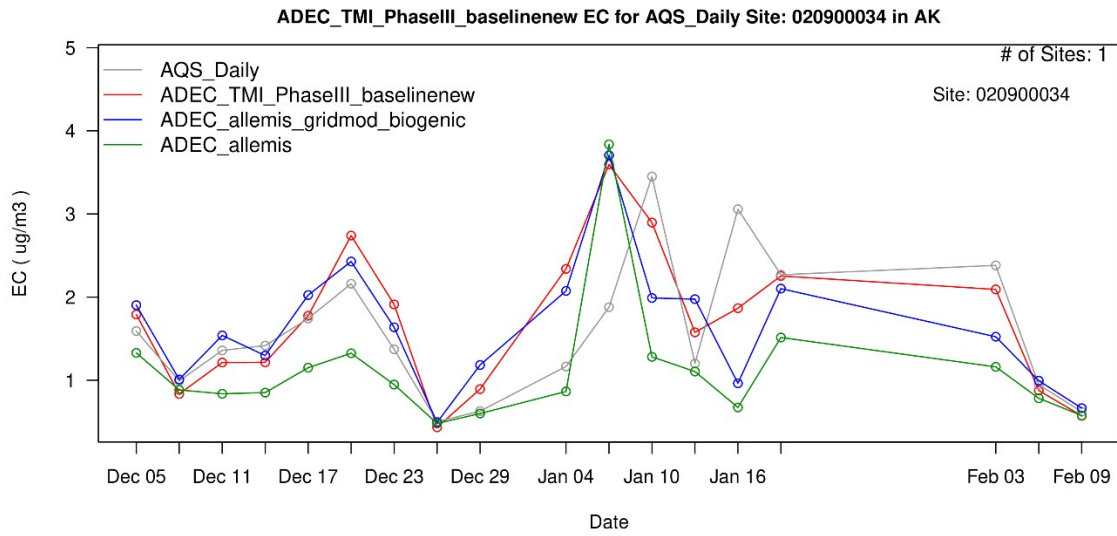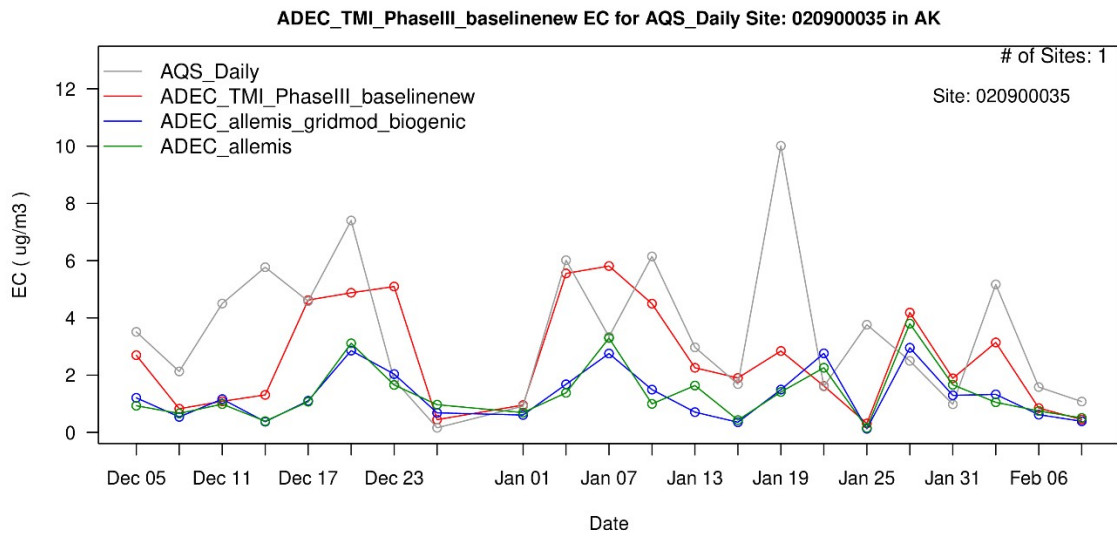

S 2: Timeseries of EC at NCore (020900034) and Hurst Road (020900035) monitors for the modeling period

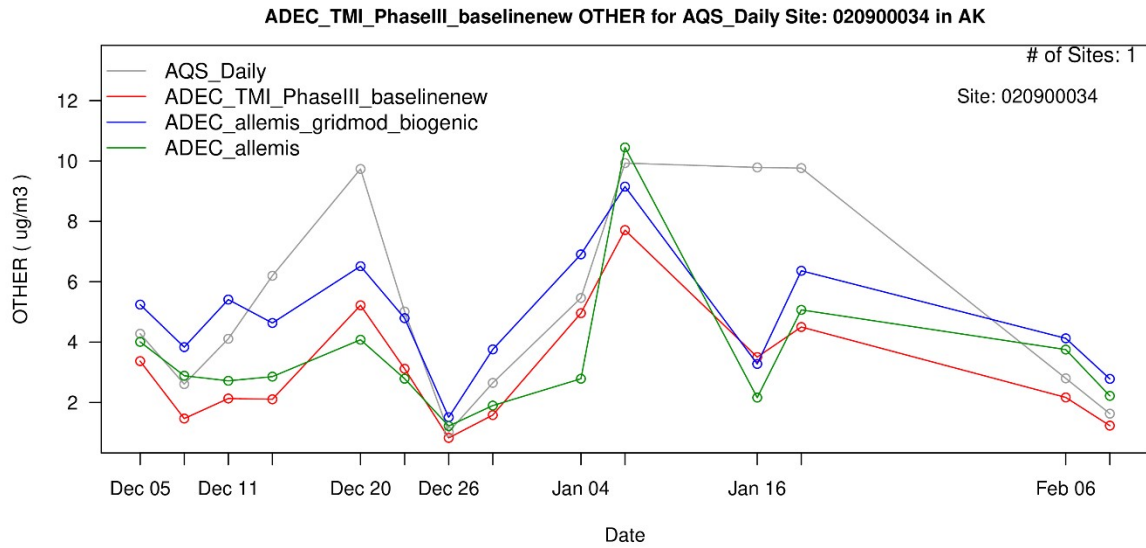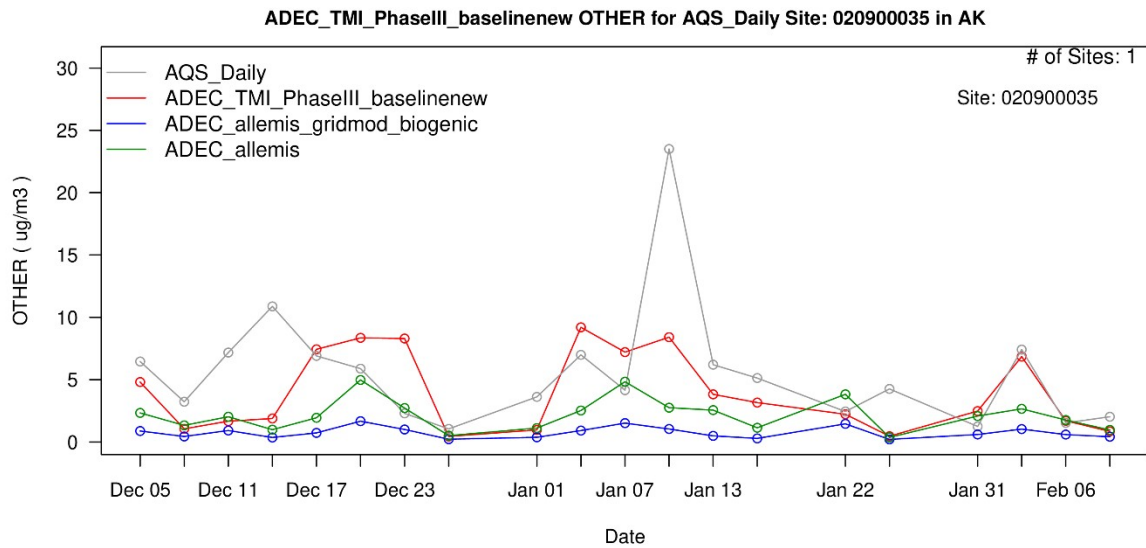

S 3: Timeseries of OTHER at NCore (020900034) and Hurst Road (020900035) monitors for the modeling period

S 4: Statistics of speciated PM and total PM2.5 for the modeling episode at Hurst Road monitor

| Species | Number of Observations | Mean Obs ( $\mu\text{g}/\text{m}^3$ ) | Mean Model ( $\mu\text{g}/\text{m}^3$ ) | Mean Bias | Mean Error | Normalized Mean Bias (NMB, %) | Normalized Mean Error (NME, %) | Fractional Bias (FB, %) | Fractional Error (FE, %) | Root Mean Square Error (RMSE) | Correlation |
|---------|------------------------|---------------------------------------|-----------------------------------------|-----------|------------|-------------------------------|--------------------------------|-------------------------|--------------------------|-------------------------------|-------------|
| NO3     | 22                     | 0.67                                  | 1.01                                    | 0.60      | 0.34       | 50.2                          | 88.5                           | 5.5                     | 73.3                     | 0.79                          | 0.33        |
| SO4     | 22                     | 2.26                                  | 2.52                                    | 1.10      | 0.26       | 11.5                          | 48.8                           | 4.9                     | 44.0                     | 1.68                          | 0.50        |
| NH4     | 22                     | 0.80                                  | 1.12                                    | 0.61      | 0.33       | 41.1                          | 76.5                           | 37.9                    | 66.0                     | 0.86                          | 0.43        |
| EC      | 22                     | 3.53                                  | 2.60                                    | 1.74      | -0.93      | -26.3                         | 49.3                           | -25.9                   | 59.8                     | 2.45                          | 0.45        |
| OC      | 22                     | 14.47                                 | 13.58                                   | 6.42      | -0.89      | -6.2                          | 44.4                           | -8.9                    | 57.8                     | 9.24                          | 0.64        |
| PM_TOT  | 21                     | 25.08                                 | 24.96                                   | 11.06     | -0.12      | -0.5                          | 44.1                           | -9.3                    | 50.1                     | 16.11                         | 0.61        |

S 5: Statistics of speciated PM and total PM2.5 for the modeling episode at NCore monitor

| Species | Number of Observations | Mean Obs ( $\mu\text{g}/\text{m}^3$ ) | Mean Model ( $\mu\text{g}/\text{m}^3$ ) | Mean Bias | Mean Error | Normalized Mean Bias (NMB, %) | Normalized Mean Error (NME, %) | Fractional Bias (FB, %) | Fractional Error (FE, %) | Root Mean Square Error (RMSE) | Correlation |
|---------|------------------------|---------------------------------------|-----------------------------------------|-----------|------------|-------------------------------|--------------------------------|-------------------------|--------------------------|-------------------------------|-------------|
| NO3     | 22                     | 1.07                                  | 1.06                                    | 0.48      | -0.01      | -1.3                          | 45.0                           | -22.6                   | 52.2                     | 0.65                          | 0.51        |
| SO4     | 22                     | 3.41                                  | 3.29                                    | 1.21      | -0.12      | -3.4                          | 35.4                           | -2.1                    | 32.3                     | 1.80                          | 0.69        |
| NH4     | 22                     | 1.31                                  | 1.35                                    | 0.56      | 0.05       | 3.4                           | 43.0                           | 11.2                    | 40.8                     | 0.85                          | 0.66        |
| EC      | 18                     | 1.60                                  | 1.72                                    | 0.42      | 0.12       | 7.5                           | 26.5                           | 6.0                     | 23.1                     | 0.63                          | 0.71        |
| OC      | 18                     | 3.54                                  | 7.31                                    | 3.84      | 3.77       | 106.6                         | 108.5                          | 59.3                    | 61.9                     | 5.06                          | 0.82        |
| PM_TOT  | 18                     | 15.31                                 | 18.16                                   | 5.68      | 2.85       | 18.6                          | 37.1                           | 9.7                     | 27.8                     | 8.52                          | 0.72        |

S6 Emission Plots for each sector Aircraft, Area, Non-Road, On-Road, Point, Space-Heat and pollutant (PM2.5, NO<sub>x</sub>, SO<sub>2</sub>, VOC) for the control year 2027

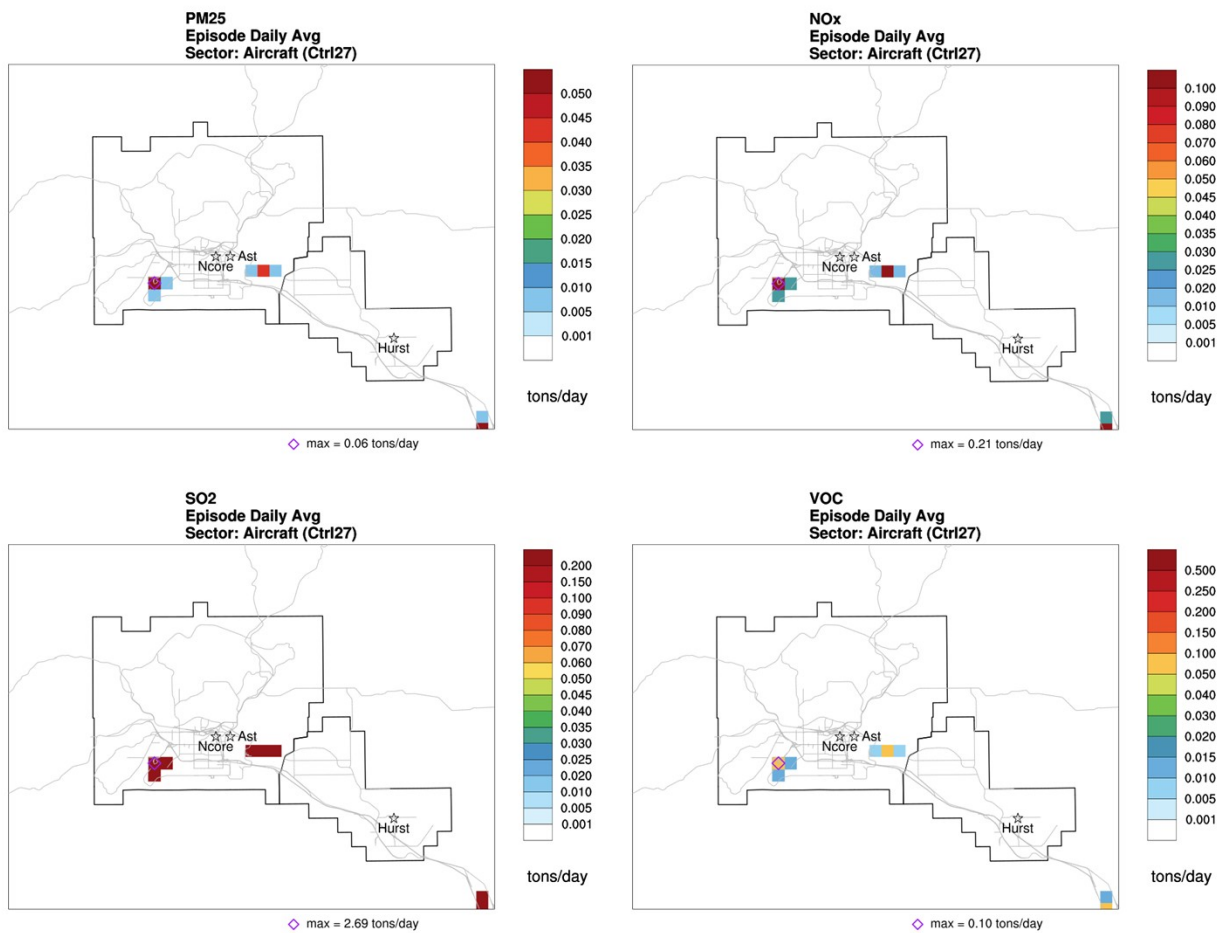

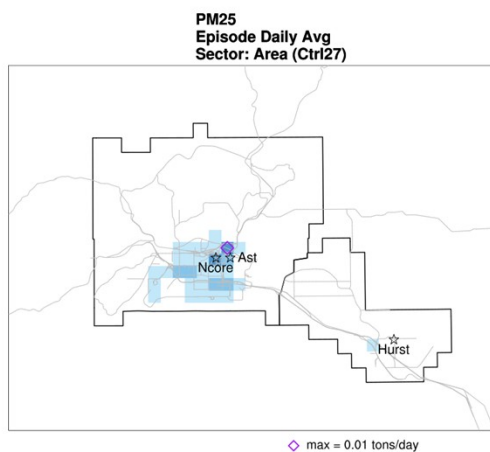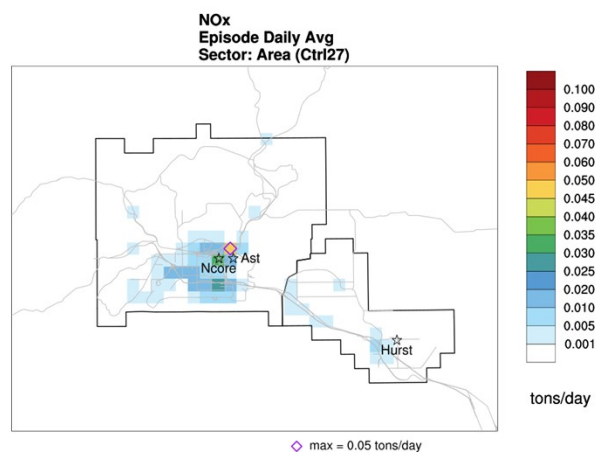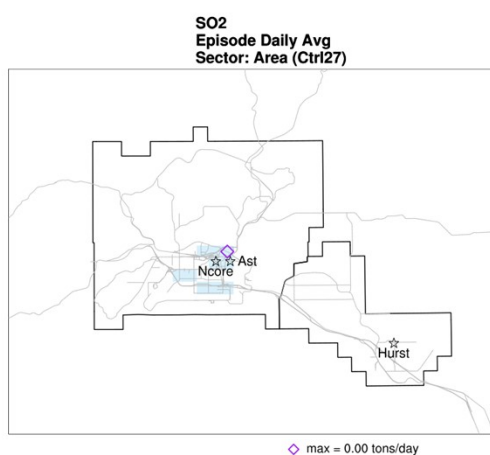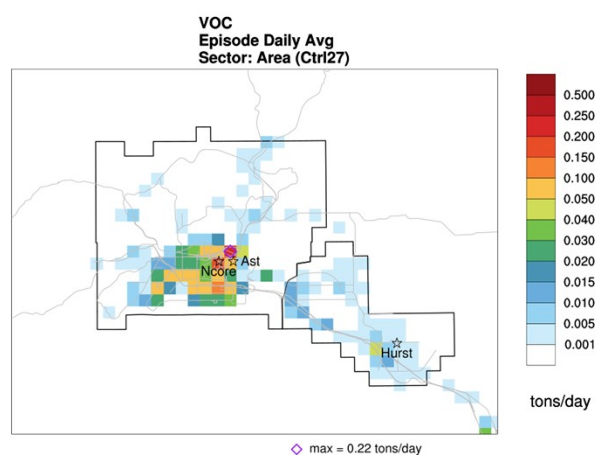

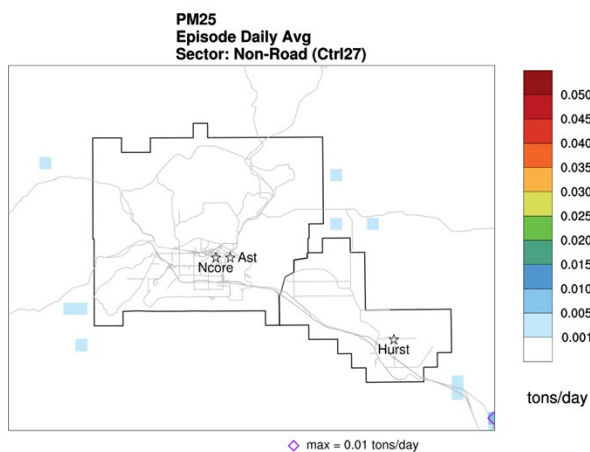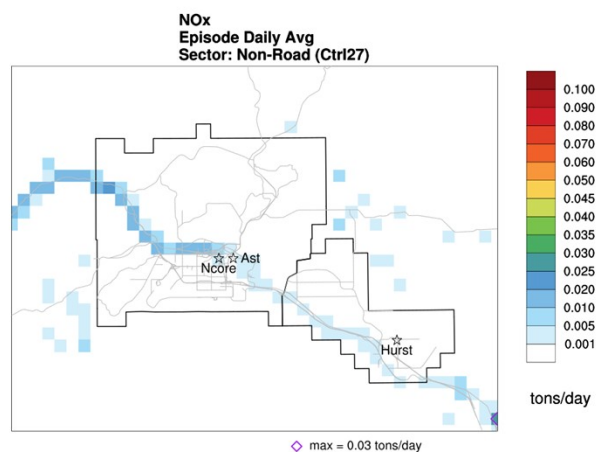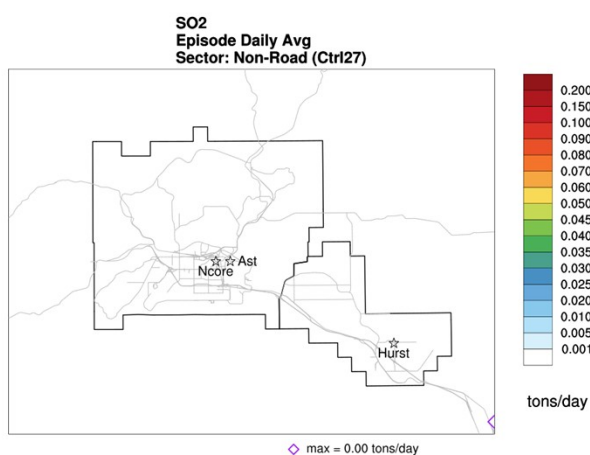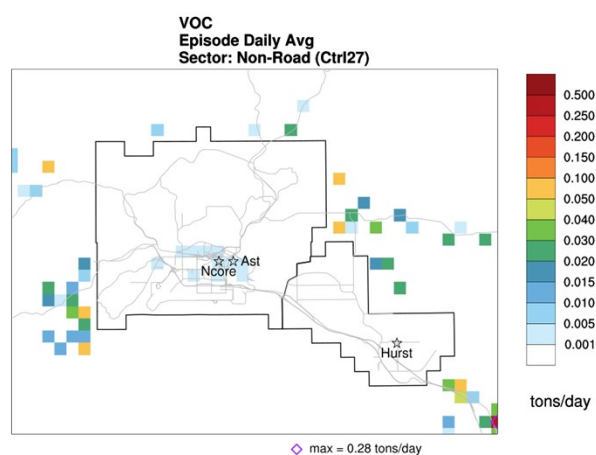

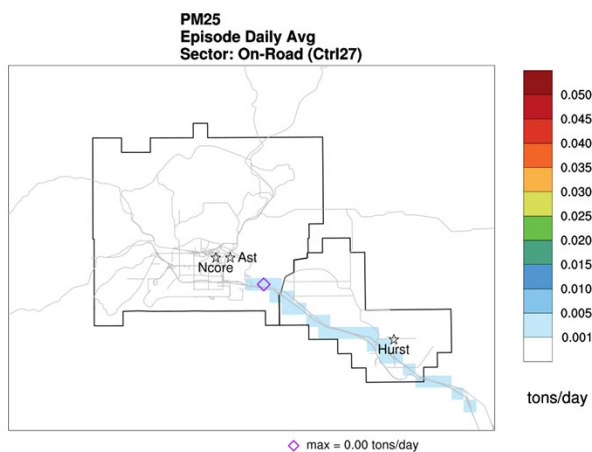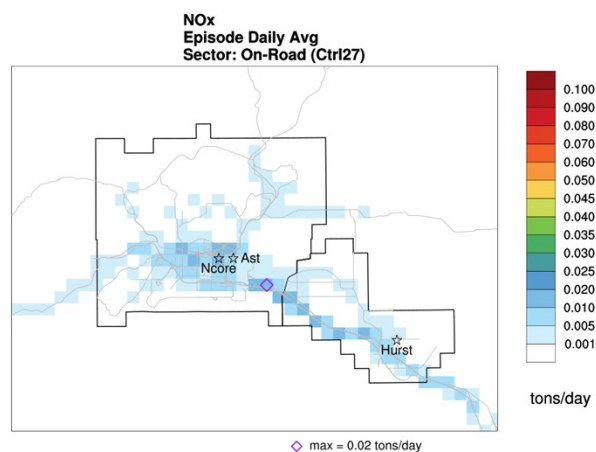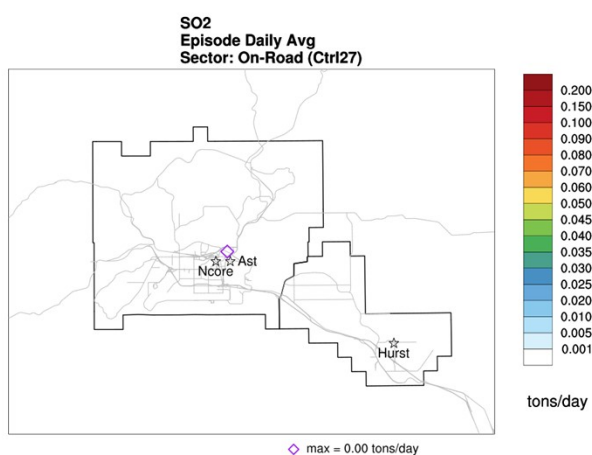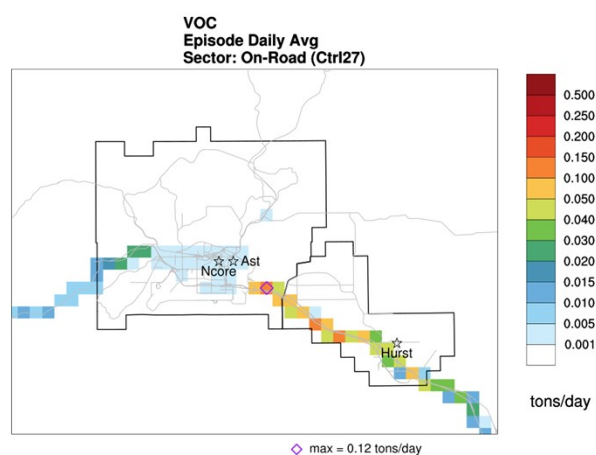

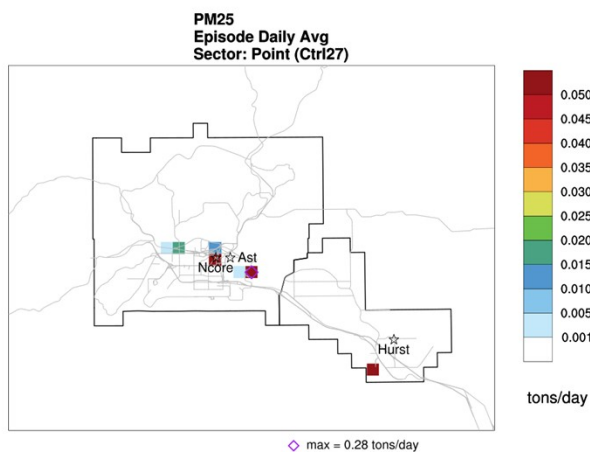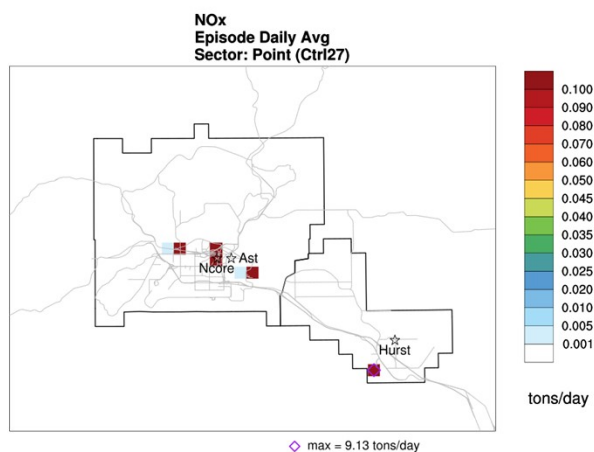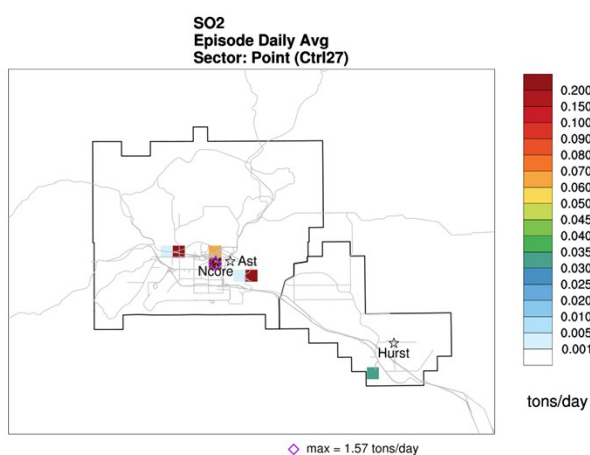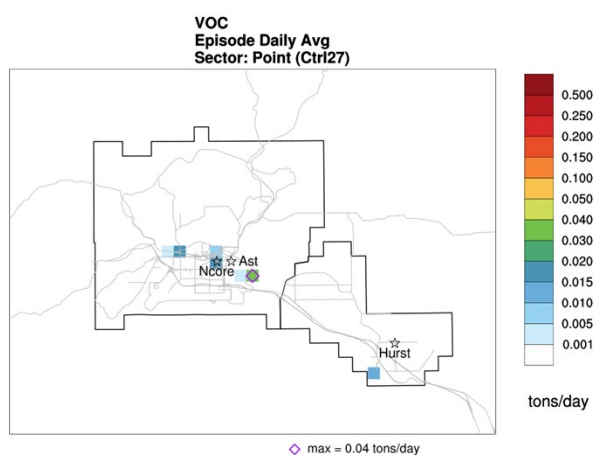

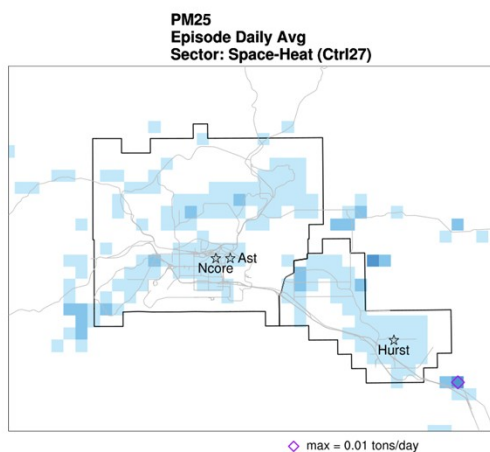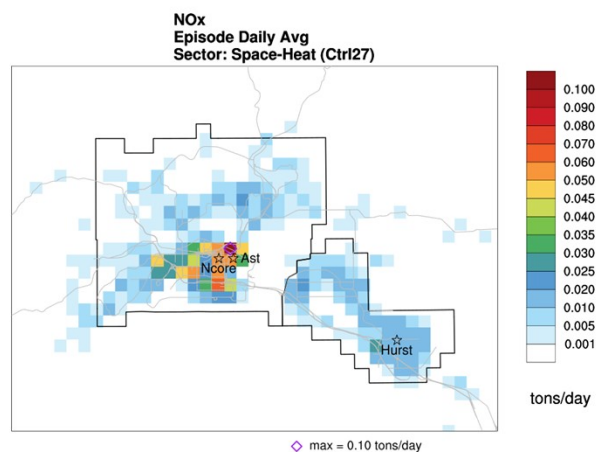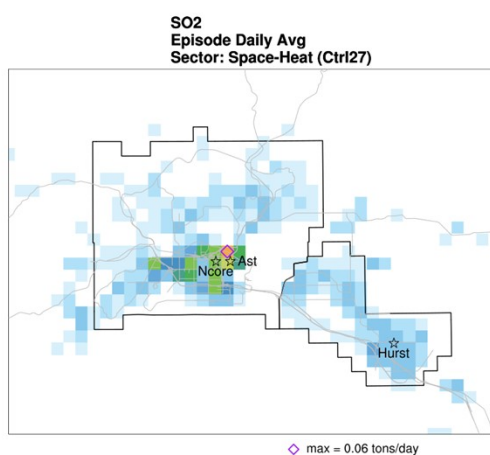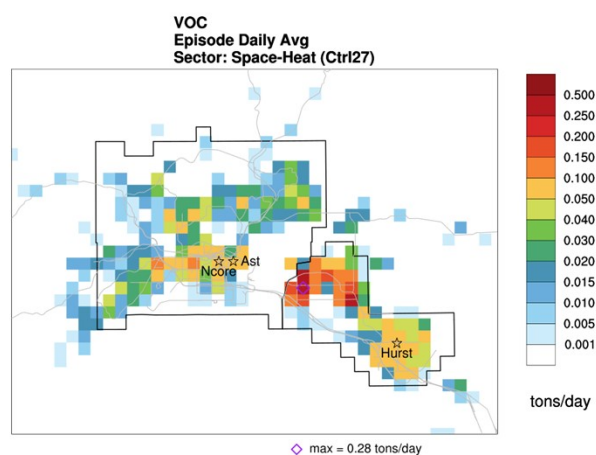

## S 7 SO<sub>2</sub> Precursor Summary

|                       |     | Episode Average |          |          | Max Daily Value |          |          |
|-----------------------|-----|-----------------|----------|----------|-----------------|----------|----------|
| CMAQ Sensitivity 100% |     | A Street        | NCore    | Hurst    | A Street        | NCore    | Hurst    |
| CMAQ - Absolute       |     |                 |          |          |                 |          |          |
|                       | SOx | -0.08703        | -0.14015 | -0.06109 | -0.23067        | -0.37986 | -0.60623 |
|                       |     |                 |          |          |                 |          |          |
| CMAQ - Design Value   |     |                 |          |          |                 |          |          |
|                       | SOx | -0.21665        | -0.14372 | -0.21052 |                 |          |          |

The Emission Factors for space heating and for point sources are attached in excel spreadsheets:

EFs\_SpaceHeating\_RevSIP.xlsx

PointSource\_EFs\_By\_EmissionUnit.xlsx

**The SCC codes that were replaced with OMNI locally tested wood profiled are attached:** in Speciations\_SpaceHeating\_OMNI.xlsx

From SMOKE, gspro\_ptnonipm\_cmaq\_cb05\_omni\_100518.txt

**The species specific RRFs and Future DV calculations are in the manual SMAT spreadsheet:**

SMAT\_091523.xls

### **Details on the updated to CMAQv5.3.3+**

Updates were made to CMAQv5.3.3+ to add a representation of heterogeneous sulfur chemistry in aerosol water, including the formation and loss of hydroxymethanesulfonate (HMS). Aqueous aerosol sulfur reactions were parameterized with a reactive probability formulation (Cheng et al., 2016; Shao et al., 2019; Jacob, 2000) as follows:

$$\frac{dSO_4^{2-}}{dt} = k \times [SO_2 \text{ or reactant}] , \quad (1)$$

$$k = \left( \frac{r}{D_g} + \frac{4}{v\gamma} \right)^{-1} A , \quad (2)$$

$$\gamma = \left( \frac{1}{\alpha} + \frac{v}{4H^*RT\sqrt{D_a k_{chem}}} \frac{1}{f_q} \right)^{-1} , \quad (3)$$

$$f_q = \left( \coth(q) - \frac{l}{q} \right) , \quad (4)$$

$$q = r \left( \frac{k_{chem}}{D_a} \right)^{0.5} , \quad (5)$$

where  $r$  = particle radius,  $D_g$  = gas-phase diffusivity of  $SO_2$  or reactant,  $v$  = mean molecular speed of  $SO_2$  or reactant,  $A$  = aerosol surface area,  $\gamma$  = reactive uptake coefficient,  $\alpha$  = accommodation coefficient of  $SO_2$  or reactant,  $H^*$  = effective Henry's law coefficient of  $SO_2$  or reactant,  $R$  = ideal gas constant,  $T$  = temperature (K),  $D_a$  = aqueous diffusion coefficient,  $k_{chem}$  =

(pseudo) first-order aqueous-phase reaction rate coefficient, and  $q$  = the diffuso-reactive parameter (Schwartz and Friberg, 1981).

The uptake gas was determined by the limiting mass transfer rate,  $J_{aq,lim}$ :

$$J_{aq,lim} = \min\{J_{SO_2}J_{RXT}\}, \quad (6)$$

where

$$J_x = k_{mt,x} H_x^* p_{x,\infty}, \quad (7)$$

$$k_{mt,x} = \left[ \frac{r^2}{3D_g} + \frac{4r}{3\alpha v} \right]^{-1}, \quad (8)$$

where “x” = SO<sub>2</sub> or reactant (RXT) for a given reaction,  $p_{x,\infty}$  = partial pressure of species x in the bulk gas phase, and  $v$  = mean molecular speed of x. The aqueous concentration of the other (non-limiting) reactant is rolled into the pseudo-first order reaction rate coefficient,  $k_{chem}$  [s<sup>-1</sup>]. For species originating in the gas phase, the aqueous concentration [M] is estimated with the effective Henry’s law coefficient and partial pressure,  $[X] = H_x^* p_{x,\infty}$ . Concentrations [M] of species that primarily reside in the aerosol phase are estimated using the mass concentration of the species in air [ $\mu\text{g m}^{-3}$  air], molecular weight [g mol<sup>-1</sup>], and the accumulation mode volume concentration [ $\text{m}^3 \text{m}^{-3}$  air]. [H<sup>+</sup>], inorganic aerosol liquid water content (ALW), and the phase distribution of semi-volatile inorganic species is provided by ISORROPIA II (Fountoukis and Nenes, 2007). Water associated with organics is estimated as described in Pye et al. (2017) with total aerosol liquid water content equal to the sum of inorganic and organic water.

Significant uncertainty lies in the S(IV) oxidation rates in aerosol water, where concentrations are orders of magnitude higher than the dilute (cloud-like) conditions under which many of the aqueous-phase oxidation rates were determined. The rates may be enhanced or inhibited with increasing ionic strength, and this is an active area of research (Liu et al., 2021). Here we applied ionic strength (enhancement and/or inhibition) factors (ISF) to adjust rate coefficients when shifting from a cloud- to aerosol-water environment. Ionic strength used to calculate aerosol water ISFs is estimated from the concentrations of the transported dissociating aerosol species but limited to the maximum ionic strength in the experiments investigating a particular ISF. As in Farrell et al. (2024), ISFs were used to adjust the rate coefficients for the oxidation of SO<sub>2</sub> by H<sub>2</sub>O<sub>2</sub>, O<sub>3</sub>, and transition metal-catalyzed O<sub>2</sub> (TMI) as well as the effective Henry’s law coefficients for SO<sub>2</sub> and H<sub>2</sub>O<sub>2</sub>. Also included is the ionic-strength dependent reaction rate for the reaction of S(IV) with NO<sub>2</sub> as described in Chen et al. (2019). In the cases where multiple oxidation rate expressions have been suggested in the literature (i.e., TMI and NO<sub>2</sub>), the rates have been averaged with equal weighting. For more information on rate expressions, coefficients, and other parameters, please refer to Fahey et al. (in preparation) and Farrell et al. (2024).

Cloud/fog chemistry is modeled using CMAQ's KMT2 cloud option (Fahey et al., 2017; Fahey et al., submitted). This cloud module includes the formation and loss of HMS as well as inorganic S(IV) oxidation by H<sub>2</sub>O<sub>2</sub>, O<sub>3</sub>, transition metal-catalyzed O<sub>2</sub>, methyl hydroperoxide, peroxyacetic acid, peroxyntic acid, NO<sub>2</sub>, OH and NO<sub>3</sub> radicals, and N(III). ISFs are not applied to chemical rates in cloud/fog water.

## References:

- Cheng, Y., Zheng, G., Wei, C., Mu, Q., Zheng, B., Wang, Z., Gao, M., Zhang, Q., He, K., Carmichael, G., Pöschl, U., and Su, H.: Reactive nitrogen chemistry in aerosol water as a source of sulfate during haze events in China, *Sci. Adv.*, 2016.
- Chen, T., Chu, B., Ge, Y., Zhang, S., Ma, Q., He, H., and Li, S.-M.: Enhancement of aqueous sulfate formation by the coexistence of NO<sub>2</sub>/NH<sub>3</sub> under high ionic strengths in aerosol water. *Environmental Pollution*, 252, 236-244. doi:<https://doi.org/10.1016/j.envpol.2019.05.119>, 2019.
- Fahey, K. M., Carlton, A. G., Pye, H. O. T., Baek, J., Hutzell, W. T., Stanier, C. O., Baker, K. R., Appel, K. W., Jaoui, M., and Offenberg, J. H., 2017. A framework for expanding aqueous chemistry in the Community Multiscale Air Quality (CMAQ) model version 5.1, *Geosci. Model Dev.*, 10, 1587–1605, <https://doi.org/10.5194/gmd-10-1587-2017>.
- Fahey, K.M., Gilliam, R.C., Pouliot, G., Huff, D., Murphy, B.N., Holder, A., Martin, J., Briggs, N., Farrell, S., Kotchenruther, R., Pye, H.O.T., and Sarwar, G.: Predicting PM<sub>2.5</sub> in and around Fairbanks with the Community Multiscale Air Quality modeling system during the ALPACA winter air quality study, in preparation.
- Fahey, K.M., Sareen, N., Carlton, A.G., and Hutzell, W.T. Updated in-cloud secondary aerosol production in the Northern Hemisphere predicted by the Community Multiscale Air Quality Modeling System version 5.3. Submitted.
- Farrell, S. L., Pye, H. O. T., Gilliam, R., Pouliot, G., Huff, D., Sarwar, G., Vizuete, W., Briggs, N., and Fahey, K.: Predicted impacts of heterogeneous chemical pathways on particulate sulfur over Fairbanks, Alaska, the N. Hemisphere, and the Contiguous United States, *EGUsphere* [preprint], <https://doi.org/10.5194/egusphere-2024-1550>, 2024.

Fountoukis, C. and Nenes, A., 2007. ISORROPIA II: a computationally efficient thermodynamic equilibrium model for  $\text{K}^+$ – $\text{Ca}^{2+}$ – $\text{Mg}^{2+}$ – $\text{NH}_4^+$ – $\text{Na}^+$ – $\text{SO}_4^{2-}$ – $\text{NO}_3^-$ – $\text{Cl}^-$ – $\text{H}_2\text{O}$  aerosols, *Atmos. Chem. Phys.*, 7, 4639–4659, <https://doi.org/10.5194/acp-7-4639-2007>.

Jacob, D.J.: Heterogeneous chemistry and tropospheric ozone, *Atmospheric Environment*, 34, 2131–2159, 2000.

Liu, T., Chan, A.W.H., and Abbatt, J.P.D.: Multiphase Oxidation of Sulfur Dioxide in Aerosol Particles:

Implications for Sulfate Formation in Polluted Environments, *Environ. Sci. Technol.*, 55, 4227–4242, 2021.

Pye, H. O. T., Murphy, B. N., Xu, L., Ng, N. L., Carlton, A. G., Guo, H., Weber, R., Vasilakos, P., Appel, K. W.,

Budisulistiorini, S. H., Surratt, J. D., Nenes, A., Hu, W., Jimenez, J. L., Isaacman-VanWertz, G., Myszal, P. K., and

Goldstein, A. H.: On the implications of aerosol liquid water and phase separation for organic aerosol mass,

*Atmos. Chem. Phys.*, 17, 343–369, <https://doi.org/10.5194/acp-17-343-2017>, 2017.

Schwartz, S. E. and Freiberg, J. E.: Mass-transport limitation to the rate of reaction of gases in liquid droplets: application to oxidation of  $\text{SO}_2$  in aqueous solutions, *Atmos. Environ.*, 15, 1129–1144, doi:10.1016/0004-6981(81)90303-6, 1981.

Shao, J., Chen, Q., Wang, Y., Lu, X., He, P., Sun, Y., Shah, V., Martin, R. V., Philip, S., Song, S., Zhao, Y., Xie, Z., Zhang, L., and Alexander, B., 2019. Heterogeneous sulfate aerosol formation mechanisms during wintertime Chinese haze events: air quality model assessment using observations of sulfate oxygen isotopes in Beijing, *Atmos. Chem. Phys.*, 19, 6107–6123, <https://doi.org/10.5194/acp-19-6107-2019>.
